# Supplementary material
Source: PubMed Central journal article supplement (PMC6813594)
Supplement: jamaophthalmol-137-1444-s001.pdf [file jamaophthalmol-137-1444-s001.pdf]

## Supplementary Online Content

Demirci H, Demirci FY, Ciftci S, et al. Integrative exome and transcriptome analysis of conjunctival melanoma and its potential application for personalized therapy. *JAMA Ophthalmol*. Published online October 24, 2019. doi:10.1001/jamaophthalmol.2019.4237

**eTable.** Clinical Features, Management, and Prognosis of Conjunctival Melanoma Patients

**eFigure.** Copy Number Plots of Conjunctival Melanomas

This supplementary material has been provided by the authors to give readers additional information about their work.

**Supplementary Table. Clinical Features, Management and Prognosis of Conjunctival Melanoma Patients**

| Case* | Gender | Involved Eye | Tumor Location                                                                            | TNM staging at presentation | Management                                                                        | Follow-up (months) | Metastasis                                              |
|-------|--------|--------------|-------------------------------------------------------------------------------------------|-----------------------------|-----------------------------------------------------------------------------------|--------------------|---------------------------------------------------------|
| 1     | Male   | Left         | Lower bulbar, forniceal and palpebral conjunctiva                                         | pT2b<br>pN0<br>cM0          | Excisional biopsy                                                                 | 36                 | None                                                    |
| 2     | Male   | Left         | Lower bulbar conjunctiva                                                                  | pT2d<br>pN0<br>cM0          | Excisional biopsy and plaque radiotherapy                                         | 30                 | None                                                    |
| 3     | Female | Left         | Diffuse on bulbar and both palpebral conjunctiva, and anterior orbit                      | pT3c<br>pN0<br>cM0          | Exenteration                                                                      | 41                 | None                                                    |
| 4     | Female | Right        | Inferior bulbar conjunctiva                                                               | pT1c<br>pN0<br>cM0          | Excisional biopsy                                                                 | 24                 | None                                                    |
| 5     | Female | Left         | Diffuse on bulbar and both palpebral conjunctiva, and anterior orbit, lower eyelid margin | pT3c<br>pN0<br>cM0          | Neoadjuvant therapy with dabrafenib and trametinib, followed by excisional biopsy | 13                 | Lung and brain                                          |
| 6     | Male   | Right        | Temporal bulbar conjunctiva                                                               | pT2b<br>pN0<br>cM0          | Excisional biopsy and plaque radiotherapy                                         | 17                 | None                                                    |
| 7     | Female | Left         | Temporal bulbar and forniceal conjunctiva                                                 | pT1c<br>pN0<br>cM0          | Excisional biopsy and plaque radiotherapy                                         | 88                 | None                                                    |
| 8     | Male   | Left         | Diffuse on bulbar, and inferior palpebral conjunctiva, and anterior orbit                 | pT3c<br>pN0<br>cM0          | Exenteration                                                                      | 4                  | Local head and neck lymph nodes and systemic metastasis |

\*The mean age was 68 years (median, 69 years; range, 32-89 years)

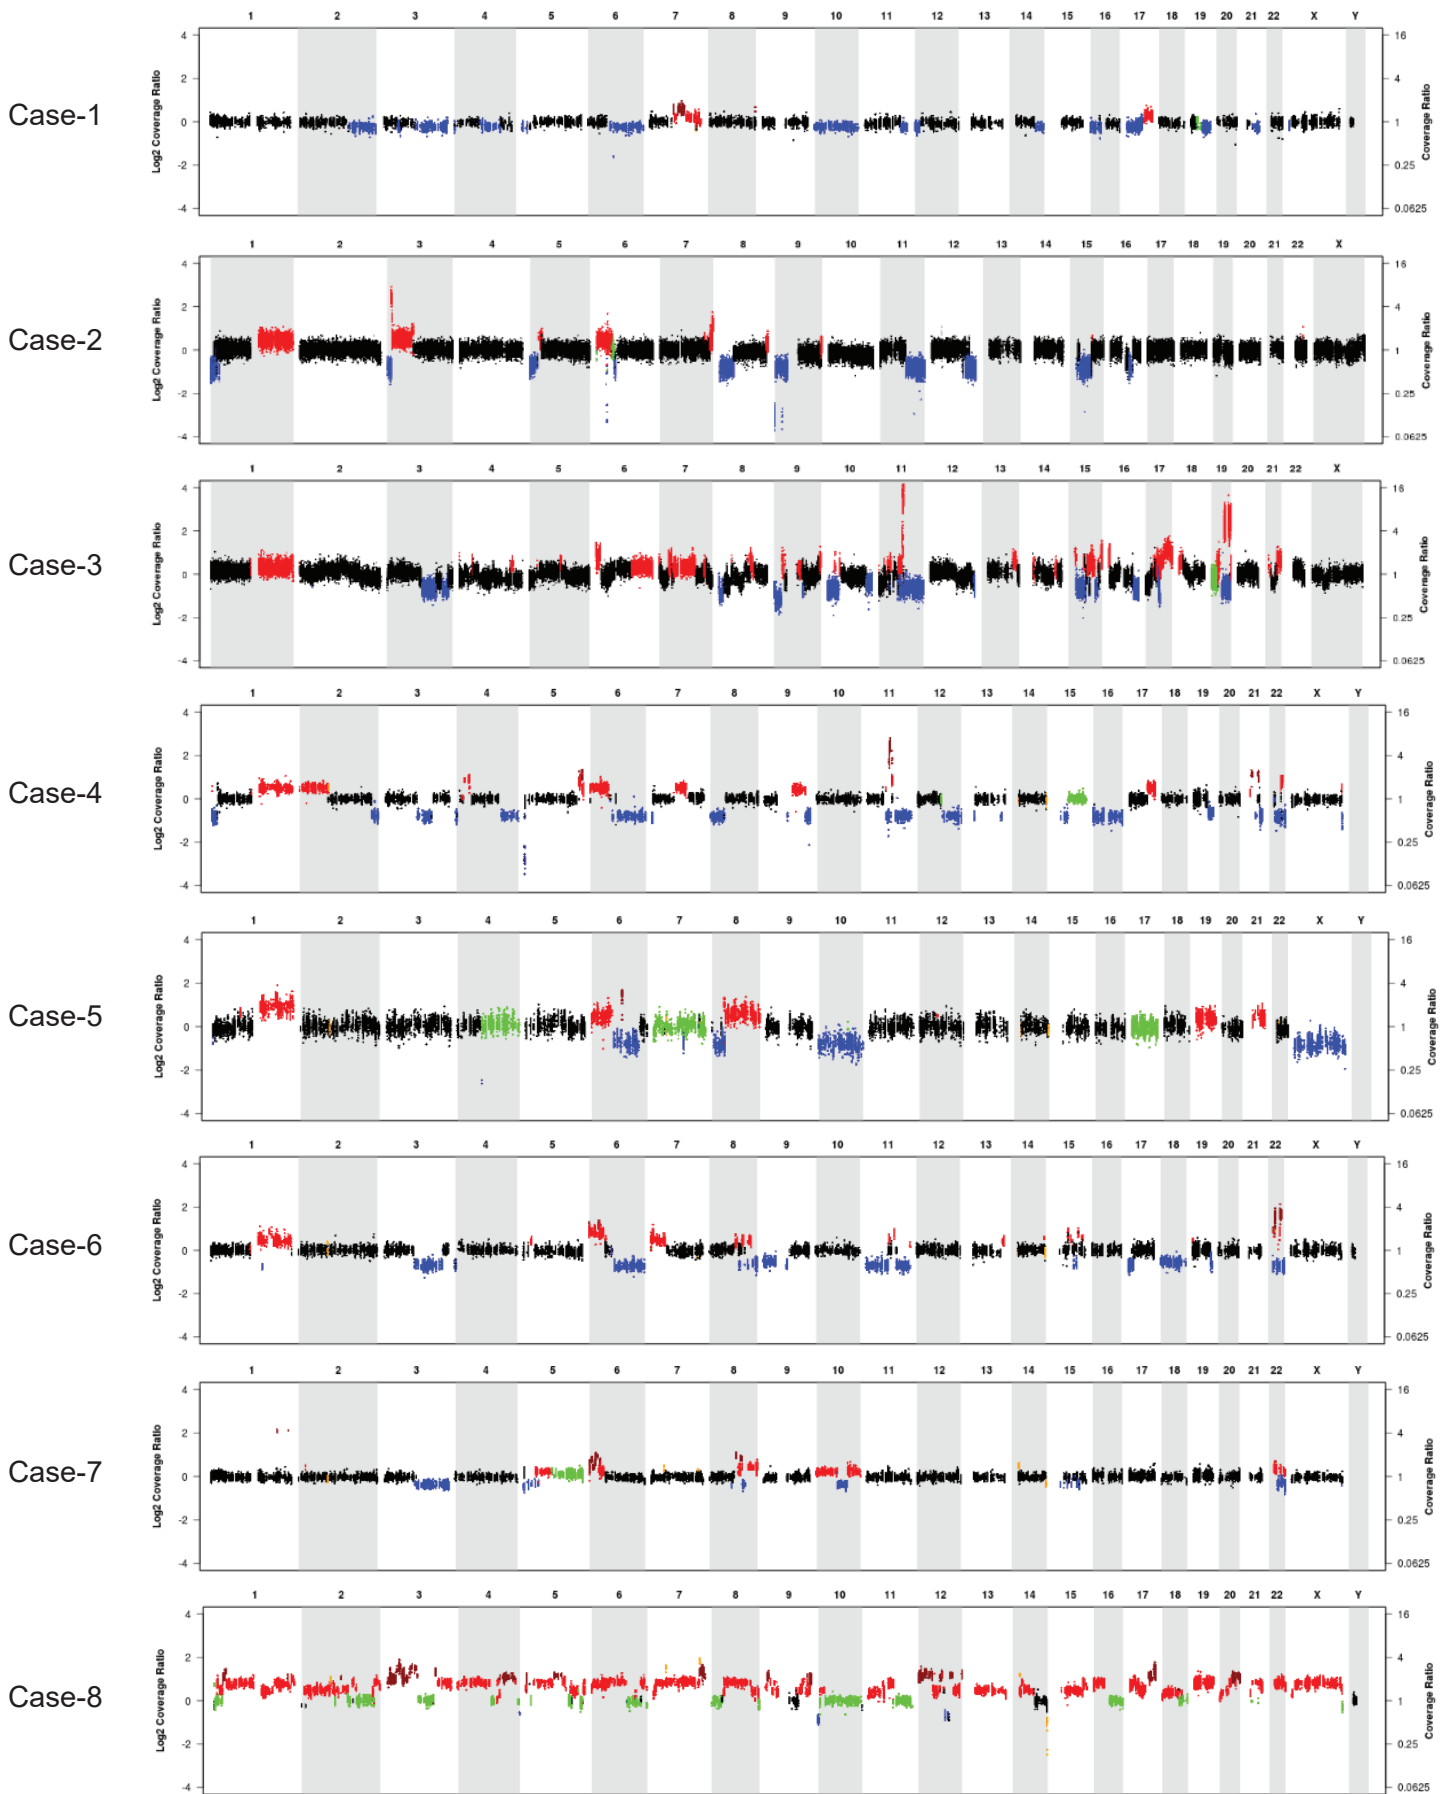

eFigure. Copy number plots of conjunctival melanomas. Gene copy number landscape was assessed by matched tumor-normal sequencing. Chromosomes are numbered above each plot. Copy-number changes are indicated by color. Black, neutral; green, copy neutral LOH; red, gain; blue, copy loss.
